# Supplementary material for: Fluorescence In Situ Hybridization in Primary Diagnosis of Biliary Strictures: A Single-Center Prospective Interventional Study
Source: MDPI journal article supplement (doi:10.3390/biomedicines11030755), 2023-03-02
Supplement: s1 [file s1]

**Supplementary Table S1: Statistical performances of brush cytology (BC) vs. BC + FISH (malignant diagnosis group)**

| n= 74       | Malignant outcome  |               |       |                    |               |       |               |               |       |
|-------------|--------------------|---------------|-------|--------------------|---------------|-------|---------------|---------------|-------|
|             | Pancreatic tumors* |               |       | Cholangiocarcinoma |               |       | Others**      |               |       |
|             | BC                 | BC + FISH     | p     | BC                 | BC + FISH     | p     | BC            | BC +FISH      | p     |
| Sensitivity | 0.316              | 0.421         | 0.343 | 0.458              | 0.680         | 0.117 | 0.300         | 0.400         | 0.639 |
| (95% CI)    | (0,175-0,486)      | (0.263-0.592) |       | (0.256-0.672)      | (0.465-0.851) |       | (0.067-0.653) | (0.122-0.738) |       |
| Specificity | 0.852              | 0.741         | 0.311 | 0.852              | 0.741         | 0.311 | 0.852         | 0.741         | 0.311 |
| (95% CI)    | (0.663-0.958)      | (0.537-0.889) |       | (0.663-0.958)      | (0.537-0.889) |       | (0.663-0.958) | (0.537-0.889) |       |
| PPV         | 0.750              | 0.696         | 0.712 | 0.733              | 0.708         | 0.866 | 0.429         | 0.364         | 0.783 |
| (95% CI)    | (0.476-0.927)      | (0.471-0.868) |       | (0.449-0.922)      | (0.489-0.874) |       | (0.099-0.816) | (0.109-0.692) |       |
| NPV         | 0.469              | 0.476         | 0.940 | 0.639              | 0.714         | 0.535 | 0.767         | 0.769         | 0.986 |
| (95% CI)    | (0.325-0.617)      | (0.320-0.636) |       | (0.462-0.792)      | (0.513-0.868) |       | (0.577-0.901) | (0.563-0.910) |       |
| Accuracy    | 0.538              | 0.554         | 0.855 | 0.667              | 0.721         | 0.622 | 0.703         | 0.649         | 0.631 |
| (95% CI)    | (0.410-0.663)      | (0.725-0.677) |       | (0.521-0.792)      | (0.569-0.829) |       | (0.530-0.841) | (0.475-0.798) |       |

FISH = fluorescence in situ hybridization, BC = brush cytology, PPV = positive predictive value, NPV =

negative predictive value, CI = confidence interval, p = p-value (BC vs. BC + FISH),

\*Pancreatic tumors = pancreatic ductal adenocarcinoma (89.5%), malignant pancreatic cystic tumors (7.9%) and pancreatic lymphoma (2.6%).

\*\*Others = B cells malignant / Lymphoma (30%), gallbladder adenocarcinoma (20%), ampullary adenocarcinoma (20%), metastatic disease (liver or malignant lymph nodes compression) (30%).

**Supplementary Table S2: Statistical performances of brush cytology and brush cytology added to each chromosome in overall study population (I) vs. population with intrinsic strictures (II)**

|                    | Sensitivity<br>(95% CI) |                        | Specificity<br>(95% CI) |                        | Accuracy<br>(95% CI)   |                        | PPV   |       | NPV   |       | AUC   |       |
|--------------------|-------------------------|------------------------|-------------------------|------------------------|------------------------|------------------------|-------|-------|-------|-------|-------|-------|
|                    | I                       | II                     | I                       | II                     | I                      | II                     | I     | II    | I     | II    | I     | II    |
|                    |                         |                        |                         |                        |                        |                        |       |       |       |       |       |       |
| <b>BC</b>          | 0.361<br>(0.251-0.483)  | 0.480<br>(0.278-0.687) | 0.852<br>(0.663-0.958)  | 0.867<br>(0.595-0.983) | 0.495<br>(0.393-0.597) | 0.625<br>(0.458-0.773) | 0.867 | 0.857 | 0.333 | 0.500 | 0.606 | 0.673 |
| <b>BC + Chr 3</b>  | 0.575<br>(0.454-0.690)  | 0.808<br>(0.606-0.934) | 0.741<br>(0.537-0.889)  | 0.733<br>(0.449-0.922) | 0.620<br>(0.517-0.715) | 0.780<br>(0.624-0.894) | 0.857 | 0.840 | 0.392 | 0.688 | 0.658 | 0.771 |
| <b>BC + Chr 7</b>  | 0.658<br>(0.537-0.765)  | 0.769<br>(0.563-0.910) | 0.571<br>(0.372-0.755)  | 0.667<br>(0.384-0.882) | 0.634<br>(0.532-0.727) | 0.732<br>(0.571-0.858) | 0.800 | 0.800 | 0.390 | 0.625 | 0.614 | 0.718 |
| <b>BC + Chr 17</b> | 0.389<br>(0.276-0.511)  | 0.480<br>(0.278-0.687) | 0.852<br>(0.663-0.958)  | 0.867<br>(0.595-0.983) | 0.515<br>(0.412-0.617) | 0.625<br>(0.458-0.773) | 0.875 | 0.857 | 0.343 | 0.500 | 0.620 | 0.673 |
| <b>BC + p21</b>    | 0.417<br>(0.302-0.339)  | 0.600<br>(0.387-0.789) | 0.852<br>(0.663-0.958)  | 0.867<br>(0.595-0.983) | 0.535<br>(0.432-0.636) | 0.700<br>(0.535-0.834) | 0.882 | 0.882 | 0.354 | 0.565 | 0.634 | 0.733 |

*I = overall study population (n = 102); II = population with intrinsic strictures (n = 40); PPP = positive predictive value; NPV = negative predictive value; AUC = area under the curve; CI = confidence interval; BC = brush cytology; Chr 3, 7, and 17 = chromosomes 3, 7, and 17; p21 = chromosomal locus 9p21*

**Supplementary table S3:** Demography of the patients died during the study Follow up.

| NP | Final diagnosis                                      | Gender | Survival*<br>(Months) | Age<br>(year) | Stenosis  |
|----|------------------------------------------------------|--------|-----------------------|---------------|-----------|
| 1  | Cholangiocarcinoma in PSC                            | Male   | 6                     | 50            | Proximal  |
| 2  | Pancreatic head carcinoma                            | Male   | 3                     | 69            | Distal    |
| 3  | Cholangiocarcinoma                                   | Female | 5                     | 66            | Distal    |
| 4  | Cholangiocarcinoma                                   | Male   | 5                     | 76            | Distal    |
| 5  | Pancreatobiliary carcinoma                           | Female | 3                     | 68            | Distal    |
| 6  | Cholangiocarcinoma in PSC                            | Female | 11                    | 44            | Proximal  |
| 7  | Pancreatic head carcinoma                            | Male   | 2                     | 78            | Distal    |
| 8  | Cholangiocarcinoma                                   | Male   | 9                     | 72            | Proximal  |
| 9  | Gallbladder carcinoma                                | Male   | 6                     | 71            | Distal    |
| 10 | Lung Carcinoma/ CP**                                 | Male   | 6                     | 73            | Distal*** |
| 11 | Rectal Carcinoma (liver metastases, lymphadenopathy) | Female | 3                     | 59            | Distal    |

*NP=Patient numbers in chronological order of death, \* survival counted after initial tissue sampling, PSC= Primary sclerosing cholangitis, \*\* He died for lung cancer and not because of stenosis due to Chronic pancreatitis (CP), \*\*\* non- malignant stenosis*

**Supplementary Table S4:** Comparison of those Papanicolaou categories considered as positive for malignancy for purposes of this study and the study's final clinical diagnosis after conclusive 12-month follow-up and/or postoperative histology

| Final clinical diagnosis | PAP V | PAP VI |
|--------------------------|-------|--------|
| Malignant (%)            | 83    | 100    |
| Benign (%)               | 17    | 0      |

PAP (V, VI) = Categories of Papanicolaou Society's nomenclature for pancreatobiliary cytology, Malignant = malignant definitive clinical diagnosis, Benign = benign definitive clinical diagnosis

**Supplementary Table S5:** Statistical performances of forceps biopsy and brush cytology plus forceps biopsy

|                    | <i>Biopsy (n = 44)</i> | <i>BC</i>     | <i>BC + Biopsy</i> | <i>P*<sub>(BC vs. BC + Biopsy)</sub></i> |
|--------------------|------------------------|---------------|--------------------|------------------------------------------|
| <i>Sensitivity</i> | 0.406                  | 0.361         | 0.667              | 0.002                                    |
| <i>(95% CI)</i>    | (0.237-0.594)          | (0.251-0.483) | (0.504-0.804)      |                                          |
| <i>Specificity</i> | 0.917                  | 0.852         | 0.733              | 0.347                                    |
| <i>(95% CI)</i>    | (0.615-0.998)          | (0.663-0.958) | (0.449-0.922)      |                                          |
| <i>PPV</i>         | 0.929                  | 0.867         | 0.875              | 1.000                                    |
| <i>NPV</i>         | 0.367                  | 0.333         | 0.440              | 0.342                                    |
| <i>Accuracy</i>    | 0.545                  | 0.495         | 0.684              | 0.022                                    |
| <i>(95% CI)</i>    | (0.388-0.696)          | (0.393-0.597) | (0.548-0.801)      |                                          |

*PPV = positive predictive value, NPV = negative predictive value, CI = confidence interval, biopsy = transpapillary fluoroscopy guided forceps biopsy, BC = brush cytology, P\* = p-value (BC vs. BC + Biopsy)*

**Supplementary table S6** -Statistical performances of brush cytology (BC) vs. FISH vs. Biopsy vs. different combinations (study population)

|             | BC            | FISH          | Biopsy        | BC+ Biopsy    | BC + FISH + Biopsy |
|-------------|---------------|---------------|---------------|---------------|--------------------|
| Sensitivity | 0.361         | 0.311         | 0.406         | 0.667         | 0.739              |
| (95%CI)     | (0.251-0.483) | (0.208-0.429) | (0.237-0.594) | (0.504-0.804) | (0.589-0.857)      |

|             |               |               |               |               |               |
|-------------|---------------|---------------|---------------|---------------|---------------|
| Specificity | 0.852         | 0.821         | 0.917         | 0,733         | 0.588         |
| (95%CI)     | (0.663-0.958) | (0.631-0.939) | (0.615-0.998) | (0.449-0.922) | (0.329-0.816) |
| PPV         | 0.867         | 0.821         | 0.929         | 0.875         | 0.829         |
| NPV         | 0.333         | 0.311         | 0.367         | 0.440         | 0.455         |
| Accuracy    | 0.495         | 0.451         | 0.545         | 0.684         | 0.698         |
| (95%CI)     | (0.393-0.597) | (0.352-0.553) | (0.388-0.696) | (0.548-0.801) | (0.507-0.808) |

PPV= positive predictive value, NPV = negative predictive value, CI = confidence interval, p = p-value, BC = brush cytology, FISH = fluorescence in situ hybridization.
